# Supplementary material for: Circ_0030998 Promotes Tumor Proliferation and Angiogenesis by Sponging miR-567 to Regulate VEGFA in Colorectal Cancer
Source: Research Square preprint supplement (doi:10.21203/rs.3.rs-92165/v1), 2020-10-20
Supplement: Supplementary file 1 [file 5ef1318a5bb7ee776662c05a.xlsx]

## Sheet: miRTarBase
ABI2
ACTA1
ACVR2B
ADAMTS9
ADH1B
AKT3
AMER1
AMMECR1
APP
AR
ARHGEF9
ASB11
ATP5S
ATP7A
AZIN1
BNC2
BRCC3
BRWD3
BVES
C11orf74
C12orf60
C1D
CALHM5
CAPRIN1
CBX1
CCDC38
CCNK
CDH6
CDKN1A
CERCAM
CFL2
CHORDC1
CHP1
CLEC2D
CLN8
CREB1
CSMD1
CSRNP3
CTCF
CTSE
CYGB
CYP4V2
DCAF8
DEK
DGKH
DIAPH1
DMD
DOCK7
DUSP7
DYRK2
EDA2R
EFCAB11
ELF2
ELL2
ENTHD1
ENTPD5
EOGT
EPHA1
EPHA5
ETV6
FBXO28
FLVCR1
GABRG1
GATM
GLP1R
GLRX2
GPBP1L1
GRIN2B
GXYLT2
HACE1
HHIP
HMGXB4
HNRNPA0
HOXC8
IGF1
IGFBP5
IGLON5
ITGA1
JKAMP
KANSL1L
KATNAL1
KCNJ3
KCNJ6
KCNK12
KCNK6
KCNQ3
KIF1B
KPNA2
KPNA4
LHFPL2
LHFPL5
LPP
LRIG3
LRP2BP
MAPRE2
MB21D2
MBNL2
MED10
MKLN1
MMADHC
MX2
MYADM
MYO5A
NDUFC2-KCTD14
NECAB1
NELL2
NEUROD2
NFIC
NRF1
NT5C1B
NT5C1B-RDH14
NUFIP2
OPCML
OSBPL9
OXR1
PAPSS2
PATL1
PCDH11Y
PEG10
PEX26
PGBD4
PLCB1
PLEKHA3
PLP1
PPP4R2
PRKAA1
PROX1
PURA
PURB
RAB31
RBBP9
RBM22
RGS5
RIC8B
RPL28
RRAGC
RSPO1
SAP18
SATB1
SDK2
SEC23IP
SENP1
SESN1
SHANK3
SHH
SIGMAR1
SLC25A12
SLC35E3
SMIM21
SMTN
SORCS2
SPATA6
SPSB1
SSPN
STARD8
STMP1
STX6
SV2B
SYT9
TACR3
TAOK1
TBCK
TECRL
THBS1
TLR5
TMEM106B
TMEM106C
TMEM132B
TMEM133
TMTC3
TRAF5
TRIM13
TSPAN2
UBE2E3
UBR3
UBXN2B
UGT2B4
USP25
VEGFA
WDR72
ZBTB34
ZDHHC15
ZFHX2
ZFX
ZNF268
ZNF333
ZNF35
ZNF449
ZNF551
ZNF860
ZSWIM6

## Sheet: DIANA
UBR7
CBX5
ATP1B4
KIAA1199
RBM28
NANOG
GOLT1B
PLEKHA3
UFM1
INHBA
PLA2G12A
ZNF468
ATXN1
INSIG2
ZSWIM6
PPIL4
WDR44
SMARCC1
EFR3A
CHRM3
ANO3
EMP1
PRPF38A
ARHGAP20
ADAM10
BCL2L10
TRMT5
PALLD
GPATCH2L
ANKRD12
MOB3B
WSB1
ATRN
EPCAM
RND3
CCNT2
EIF4G3
ITGA9
RIMS1
CALB1
TFEC
PRKAR2B
PIK3C2A
BTAF1
SORD
AFG3L2
CTDSPL
2020-03-06
LIX1
PSD2
CLVS2
SLC26A7
ZNF462
HNMT
FREM2
TMEM45B
KANSL1L
CAMK4
ZFP36L2
PAN3
GPD1L
ZNF117
ATP8B1
OLA1
ADAMTS5
STEAP2
KALRN
ITGA5
MEMO1
LRRC58
EIF5A2
ABHD6
MFSD8
NPY1R
HHIP
TMEM184C
TCERG1
TMEM52B
CPSF2
POLR2M
NUDT21
ZNF91
SCARA3
FUT9
KCNAB1
DESI2
NEUROD2
CSNK1G1
ARAP2
PCNX
DACH1
ALCAM
DENND5B
SEMA3E
FNIP1
OLR1
RAB6A
OXR1
TMEM70
DST
ZNF41
EBF1
CSRNP3
BVES
PDS5B
C2orf73
AVL9
SWAP70
ZBTB34
SSBP2
KCNH5
FAM206A
PSEN1
PGR
NT5DC4
DDX53
KLHL15
HSD17B13
COA5
PAWR
RAB12
PEX26
TRIM64B
ZNF616
RBM43
KRTAP4-8
PCLO
APAF1
PARVA
PNRC1
PCGF5
AGTPBP1
MRPL35
FAM154B
DYRK1A
FSCB
TAF9B
CCR6
KIR2DL3
SRP72
ERBB4
UBE4B
ZNF107
MBNL2
TJP1
NPAS3
TRAPPC6B
ACLY
ACVR2B
FAR1
ATRNL1
SYT17
MLF1
MYO9A
SMC1B
MBNL1
FXR1
ZNF100
KIR2DL4
ERGIC2
ATG5
FAM153A
PCGF2
ENPP1
ZNF37A
NCKAP1
SGMS1
XAF1
CHML
SIPA1L2
MARK1
SLC30A1
CR2
CCDC170
RALGPS2
ETV3
NKAIN2
ADAM12
NHLRC2
CNNM2
IRAK1BP1
COL11A1
EVI5
COX15
CLCA2
KLHL31
ANGPTL3
PLCE1
KLHL13
VEGFA
RNF220
AGO3
SYNC
CHIC1
ZBTB26
OGT
PUM1
FAM76A
KLF4
SLC44A1
COL15A1
C9orf170
GPR183
PSAT1
KIF1B
OR11A1
EDNRB
PLXDC2
DIS3
PLCXD3
PRRG1
NRCAM
YPEL5
RPS6KA3
SAMD9)
LINGO2
CCDC85C
MOSPD2
BNC2
DNMT3A
SNAPC3
CDK8
ZMYND11
C5orf51
RFX3
TUSC3
C21orf59
CADM2
HACL1
FOXI2
PCNXL4
ZNF528
OPA1
MB21D2
WASF1
EYS
TSGA10
SYNPO
USP49
FAT4)
AKAP13
ZNF207
BRD7
C16orf87
CPSF7
ARHGAP24
PPP1CB
ZNF273
QRICH1
VPS13B
ENAM
RAB27A
CYP19A1
TMEM106B
RIC3
TRIM5
ZNF461
FST)
CRAMP1L
FAM98B
ARHGEF12
TRDN
WHSC1
DLG2
SMAD4
ABCG1
ROCK1
NRIP1
NCAM2
KIAA1009
EIF2B4
SLC8A1
INPP4A
TMEFF2
AAK1
CCDC14
ZNF441
MAP3K2
ARHGEF33
PRPF40A
EXOC6B
EXOC5
SS18
AGBL4
PHTF2
RBM18
CTXN2
FAM126B
CTD-3074O7.11
PLEKHA2
TNFSF10
PPP2R5C
MTHFD2L
ZNF300
SESTD1
NKTR
TBL1XR1
UBR3
FANCD2
ZNF780B
ANKHD1
ZNF257
ROBO1
PDLIM5
CCBE1
PTPRJ
DPH6
ZNF138
CAGE1
CCDC144A
PIGK
PSMC6
TARM1
PON2
CDK12
STRBP
ANKMY2
C17orf105
LANCL1
MOBP
DGKI
ZKSCAN5
GPM6B
IKZF2
ZNF28
SKIL
RYK
TTC26
ZNF525
UBN2
CCDC39
YME1L1
REPS1
FNDC3A
ZFP69B
PVRL3
PTPLAD2
PHC3
SNTN
GPALPP1
ANKRD50
POLR3G
WDR19
FAM153B
SPATA24
ZNF131
N4BP2
RP11-766F14.2
TTC39B
C4orf21
RASA1
SNAP91
RNF217
RPS20
TMEM68
KCNV1
EIF4G2
BBS1
ACER3
CD3G
ZNF720
ZNF140
CACNB4
ATXN3
NEK3
ZNF816
C12orf29
CYP46A1
SLIRP
ZNF280D
GMPR2
TERF2IP
URI1
AMTA2
ZNF263
BOD1L2
KCNJ16
C17orf78
DPY19L3
ZNF570
ZNF573
CCDC68
ZNF471
ZNF83
ZNF611
ZNF480
ZNF714
ZNF730
ZNF708
AC138655.1
ARL14EPL
ZNF30
MEI4
KCNMA1
MCU
SLC25A16

## Sheet: miRDB
CDK8
A4GNT
AAK1
ABCB5
ABCC4
ABCC6
ABCD2
ABCG1
ABHD16A
ABHD5
ABO
ABR
ACER3
ACLY
ACOT13
ACTA1
ADAM12
ADAMTS5
ADAMTSL3
ADGRL2
ADH1B
ADH7
AFF4
AGO3
AJAP1
AK9
AKAIN1
AKAP5
AKAP7
AKT3
ALCAM
ALDH1A1
ALG10B
ALG13
AMMECR1
ANGPTL3
ANKFY1
ANKRD29
ANKRD31
ANKS1B
ANKUB1
ANTXR2
AP4E1
APOOL
AR
ARAP2
ARFGEF2
ARHGAP24
ARHGAP28
ARHGEF33
ARID1A
ARIH1
ARRDC3
ASCC1
ATF7
ATG5
ATL3
ATP11A
ATP11C
ATP1B1
ATRN
ATRNL1
AVL9
AZIN1
B3GALNT2
B3GNT2
BBS1
BCL11A
BCL2L10
BEST3
BIVM
BMF
BNC2
BORA
BORCS7
BRIP1
BRK1
BROX
BRWD3
BTAF1
BTN2A1
BVES
C12orf4
C1GALT1
C1orf21
C1QTNF3
C22orf39
C2orf73
C4orf33
C5orf51
C8orf37
CA10
CADM2
CALB1
CALCRL
CAMK4
CAMTA1
CAMTA2
CAND1
CASP10
CBLN1
CCDC102B
CCDC112
CCDC170
CCDC191
CCDC6
CCDC71L
CCDC85C
CCDC88A
CCNJL
CEP162
CFAP97D1
CHIC1
CHST3
CHSY1
CLCA2
CLDN11
CLEC19A
CLEC2D
CLEC4D
CLIP1
CLOCK
CLVS2
CNBP
CNIH3
CNTN5
CNTNAP4
COG6
COL4A1
COX15
CPED1
CPSF2
CR2
CREBL2
CREBZF
CRISPLD1
CSRNP3
CTBS
CTCF
CTDSPL
CTNND2
CTTNBP2NL
CTXN2
CXCL8
CYP4F2
DACH1
DCAF16
DCANP1
DCC
DCP1B
DCTN5
DDX60
DENND5B
DESI2
DIO2
DIS3
DLG2
DLGAP1
DNMT3A
DOCK5
DPY19L3
DPYD
DUSP16
DUSP7
EDA2R
EDNRB
EFCAB11
EFR3A
EGR3
EIF4G3
ELL2
ELP3
ENAM
ENPP1
EOGT
EPB41L5
EPCAM
EREG
ERRFI1
ESRP1
ETFRF1
ETV3
EVI5
EXPH5
EYS
FAM102B
FAM120C
FAM206A
FAM3C
FAM84A
FAM91A1
FAM98B
FAR1
FAT4
FCGR3A
FCGR3B
FERMT1
FGF12
FGF5
FGFRL1
FLCN
FLT1
FNDC3B
FOXI2
FREM2
FST
FUT4
FUT9
FXR1
FXYD3
GAB1
GABRB2
GABRB3
GABRG3
GATA6
GATM
GDAP2
GDPD1
GFPT2
GK
GLCCI1
GLRX3
GOLT1B
GPALPP1
GPATCH11
GPATCH2L
GPC5
GPM6B
GPR107
GPR183
GRAMD1C
GRK3
GSK3B
GSTA1
GSTA2
GUCY1A2
HCN1
HEMGN
HIVEP3
HLA-DOA
HLA-DRA
HLA-F
HOMER1
HOXC8
HOXC9
HSPA4L
HSPE1-MOB4
HSPH1
HTR1E
HTR5A
HYKK
IARS
ICE2
IGF1R
IKZF2
IMPA1
INPP4A
INSR
INTS6
IRF2BP2
ISPD
IYD
JAM2
JCAD
KALRN
KANSL1L
KCNAB1
KCNAB3
KCND2
KCNJ16
KCNJ3
KCNN3
KCNV1
KIF2A
KIR2DL1
KIR2DL3
KIR2DL4
KIR2DS4
KIR3DL1
KIR3DL2
KLHL13
KLHL29
KLHL9
KLK6
KPNA4
LAMC3
LAMP3
LARP4
LARP4B
LCORL
LHFPL6
LIMS1
LIN28B
LINGO2
LIX1
LMLN
LPP
LRCH1
LRIG3
LRP12
LRRC19
LRRTM3
MAGEA3
MAGEA6
MAP9
MARK1
MB21D2
MBNL2
MCTP2
ME2
MED10
MFSD8
MIB1
MICU3
MIER1
MKLN1
MKRN2
MOB4
MPP6
MPV17L
MR1
MRPL35
MTF2
MTREX
MTX3
MYO1D
MYOCD
MYSM1
NAALAD2
NCBP1
NCKAP1
NEUROD2
NKAIN3
NLRP14
NPAS3
NRXN1
NTRK2
NUDT21
NUDT4
ODAPH
OLFM3
OLR1
OPA1
OPCML
OR11A1
OSBPL10
OSBPL3
OST4
PANK3
PARD3B
PARPBP
PARVA
PATL1
PBX2
PCDH17
PCNX1
PDCD6IP
PDCL
PDE10A
PDLIM3
PFDN4
PGM3
PGPEP1
PGR
PHC3
PIGK
PIKFYVE
PKHD1
PLAT
PLCXD3
PLD5
PLEKHA2
PLS3
PMP2
PNN
PNRC1
PPM1A
PPP4R2
PPTC7
PQLC3
PRDM15
PRDX3
PRKAR2B
PROKR2
PSAT1
PSD2
PTAFR
PTBP3
PTPRT
PUM1
QRICH1
R3HDM2
RAB27A
RAB7A
RALGPS2
RANBP17
RARB
RBBP9
RBM18
RBM27
RBMS2
RCOR3
REEP1
RGS22
RHOT1
RIC3
RIMKLA
RIMKLB
RIMS1
RND3
RNF11
RNF217
RNF220
RNLS
ROCK2
RPS6KA6
RS1
RYK
SAA2
SAMD12
SAMD9
SAP18
SAXO2
SCARA3
SCG3
SCN8A
SENP1
SESTD1
SETD9
SFMBT1
SGMS1
SH3RF1
SH3TC2
SIGMAR1
SIPA1L2
SKIL
SKP2
SLC12A1
SLC18A2
SLC25A31
SLC25A40
SLC26A7
SLC30A9
SLCO3A1
SLITRK4
SLMAP
SMAD4
SMAP1
SMOC2
SNAP91
SNX13
SORBS1
SPRY1
SSBP2
STEAP2
STK26
STXBP5
SUCO
SVIP
SWAP70
SYNC
SYNE1
SYNJ2BP
TAF9B
TAS2R20
TBC1D4
TBCEL
TBL1XR1
TCEA1
TCERG1
TCF3
TET2
TEX55
TFAM
TFEC
THAP2
TLR2
TM4SF1
TMED5
TMEM167A
TMEM59
TMEM68
TMEM70
TMEM87B
TMPO
TNPO1
TOMM20
TRAK2
TRAM1
TRAPPC13
TRIM33
TRMT13
TRMT5
TSGA10
TSPAN2
TTC26
TUSC3
TXLNB
U2AF1
U2AF1L5
UBE2N
UBE2W
UBE4B
UBN2
UBR2
UBR3
UFM1
UGT8
UQCRC2
UROS
USP25
UTS2B
VEGFA
VPS13B
VPS13C
VWC2
WASF1
WDR64
WWP1
YPEL5
ZBTB20
ZBTB8A
ZC2HC1A
ZC3H12C
ZDHHC3
ZFX
ZMAT3
ZNF140
ZNF225
ZNF24
ZNF25
ZNF250
ZNF268
ZNF28
ZNF280D
ZNF354C
ZNF41
ZNF441
ZNF468
ZNF471
ZNF594
ZNF704
ZNF75A
ZNF880
ZSWIM6
